# Supplementary material for: Individualized responses to velocity-based versus percentage-based resistance training in combat sports athletes: the influence of baseline characteristics
Source: PeerJ. 2025 Sep 24;13:e19928. doi: 10.7717/peerj.19928 (PMC12476169; doi:10.7717/peerj.19928)
Supplement: Supplemental Information 1 [file peerj-13-19928-s001.xlsx]

## Sheet: Experimental group 1RM
Experimental group squat bench press 1RM test
Number	Name	squat		bench press
		Before the experiment	After the experiment	Before the experiment	After the experiment
1	***	95	110	45	55
2	***	105	120	55	70
3	***	125	145	65	70
4	***	115	130	60	80
5	***	120	145	60	70
6	***	120	150	60	70
7	***	130	160	70	85
8	***	135	160	70	92.5
9	***	100	120	50	60
10	***	105	110	55	70
11	***	120	150	65	85
12	***	105	110	60	85

## Sheet: Control group 1RM
Control group squat bench press 1RM test
Number	Name	squat		bench press
		Before the experiment	After the experiment	Before the experiment	After the experiment
1	***	100	125	50	60
2	***	110	130	55	65
3	***	125	130	70	90
4	***	110	120	55	65
5	***	130	150	80	100
6	***	115	125	60	70
7	***	115	130	60	70
8	***	120	125	60	75
9	***	125	135	75	80
10	***	120	125	65	70
11	***	115	130	60	70
12	***	125	140	70	80

## Sheet: Experimental group 75%1RM
Experimental group squat bench press 75% test
Number	Name	squat		bench press
		1RM75%	average speed	1RM75%	average speed
1	***	70	0.71	32.5	0.68
2	***	75	0.66	40	0.7
3	***	77.5	0.83	47.5	0.69
4	***	92.5	0.77	45	0.78
5	***	85	0.66	45	0.71
6	***	90	0.73	45	0.76
7	***	90	0.71	52.5	0.81
8	***	100	0.85	52.5	0.68
9	***	75	0.74	37.5	0.78
10	***	77.5	0.73	40	0.8
11	***	90	0.75	47.5	0.72
12	***	77.5	0.65	45	0.63

## Sheet: Control group 75%1RM
Control group squat bench press 75% test
Number	Name	squat		bench press
		1RM75%	average speed	1RM75%	average speed
1	***	75	0.7	37.5	0.82
2	***	82.5	0.73	40	0.74
3	***	92.5	0.67	52.5	0.5
4	***	82.5	0.73	40	0.73
5	***	97.5	0.73	60	0.61
6	***	85	0.7	45	0.68
7	***	85	0.71	45	0.78
8	***	90	0.68	45	0.57
9	***	92.5	0.72	55	0.77
10	***	90	0.68	47.5	0.65
11	***	85	0.69	45	0.76
12	***	92.5	0.76	52.5	0.65
