# Supplementary material for: Individualized responses to velocity-based versus percentage-based resistance training in combat sports athletes: the influence of baseline characteristics
Source: PeerJ. 2025 Sep 24;13:e19928. doi: 10.7717/peerj.19928 (PMC12476169; doi:10.7717/peerj.19928)
Supplement: Supplemental Information 2 [file peerj-13-19928-s002.xlsx]

## Sheet: experimental group
Experimental group explosive push ball
Number	Name	4kg						6kg
		Before the experiment			After the experiment			Before the experiment			After the experiment
		speed m/s	power w	distance m	speed m/s	power w	distance m	speed m/s	power w	distance m	speed m/s	power w	distance m
1	***	1.08	104.36	3.8	1.47	183.21	4.1	1.01	144.36	3	1.41	190.26	3.5
2	***	1.3	142.79	3.7	1.67	212.56	4.1	1.34	212.21	3.4	1.46	175.76	3.6
3	***	1.02	133.07	3.8	1.23	124.61	4.4	1.02	160.61	3.9	1.76	198.52	4.8
4	***	1.31	190.16	4.2	1.61	254.4	4.3	1.21	168.68	3.2	1.54	292	4
5	***	0.94	94.94	3.5	1.2	111.68	3.8	0.72	96.44	3.7	0.76	82.79	3.4
6	***	1.04	100.72	4.3	1.44	240.65	5.2	1.41	282.15	3.2	1.72	237.56	3.4
7	***	0.83	135.63	3.8	1.4	150.07	4.5	1.03	138.34	3.9	1.53	237.56	4.1
8	***	1.14	105.92	4.4	1.21	180.69	5.1	0.91	126.79	4	1.17	193.89	4.4
9	***	1.35	143.77	3.4	1.54	186.18	3.7	1	120.98	3.4	1.29	159.74	3.4
10	***	1.42	187.71	4.4	1.83	268.82	5.3	1.34	191	4.1	1.57	233.83	4.4
11	***	1.11	121.46	4.5	1.11	124.82	4.6	1.02	141.93	3.8	1.53	231.58	3.9
12	***	1.14	129.34	4.1	1.48	202.09	4.6	1.33	200.03	3.3	1.24	223.21	3.8

## Sheet: control group
Control group explosive push ball
Number	Name	4kg						6kg
		Before the experiment			After the experiment			Before the experiment			After the experiment
		speed m/s	power w	distance m	speed m/s	power w	distance m	speed m/s	power w	distance m	speed m/s	power w	distance m
1	***	0.93	206.4	3.7	0.95	214.22	3.8	0.99	237.2	3.8	1.51	237.85	4.1
2	***	1.21	139.66	4.5	1.19	184.19	4.6	1.33	246.8	4.5	1.49	334.79	4.9
3	***	1.57	226.13	5.1	1.58	216.71	5.3	1.45	244.36	4.1	1.55	243.82	4.3
4	***	1.24	112.38	4	1.28	135.12	4.2	1.26	176.02	4.3	1.22	227.98	4.4
5	***	1.71	220.53	4.4	1.63	253.71	4.6	1.5	211.42	3.6	1.54	276.54	4
6	***	1.05	108.64	3.7	1.21	203.1	4.4	1.03	114.52	2.9	1.1	182.52	3.1
7	***	1.53	262.08	5	1.67	254.72	5.5	1.47	272.79	4.3	1.49	294.29	4.6
8	***	0.76	76.85	3.8	0.9	78.37	4.1	0.86	106.98	3.9	1.11	161.97	4.1
9	***	1.08	127.58	4.3	1.16	105.27	4.6	1.31	165.36	4	1.13	142.43	4
10	***	1.11	138.12	4.6	1.04	113.37	4.5	0.92	157.35	3.8	0.89	136.07	4
11	***	1.12	103.72	3.9	1.17	107.07	4.2	0.94	156.77	3.4	1.2	148.29	3.8
12	***	1.76	223.78	5.1	1.78	218.13	4.9	1.85	303.47	4.4	1.7	266.19	4.2
