# Supplementary material for: Individualized responses to velocity-based versus percentage-based resistance training in combat sports athletes: the influence of baseline characteristics
Source: PeerJ. 2025 Sep 24;13:e19928. doi: 10.7717/peerj.19928 (PMC12476169; doi:10.7717/peerj.19928)
Supplement: Supplemental Information 3 [file peerj-13-19928-s003.xlsx]

## Sheet: experimental group
Experimental group hexagonal test (unit: s）
Number	Name	clockwise		anticlockwise
		Before the experiment	After the experiment	Before the experiment	After the experiment
1	***	3.614	3.072	2.791	2.504
2	***	3.428	2.878	3.16	2.081
3	***	3.142	2.762	3.471	2.85
4	***	2.852	2.588	3.377	2.851
5	***	2.861	2.567	3.14	2.974
6	***	3.317	3.08	3.698	2.705
7	***	3.301	2.799	3.283	2.818
8	***	3.55	2.819	3.235	3.184
9	***	3.506	2.954	3.048	2.695
10	***	3.673	3.081	4.112	3.721
11	***	3.409	2.773	3.06	2.484
12	***	3.904	3.039	3.649	3.586

## Sheet: control group
Control group hexagonal test (unit: s）
Number	Name	clockwise		anticlockwise
		Before the experiment	After the experiment	Before the experiment	After the experiment
1	***	3.484	3.425	3.456	3.255
2	***	3.068	2.764	3.948	2.745
3	***	3.989	3.849	3.693	2.848
4	***	3.761	3.18	3.793	3.028
5	***	2.994	2.838	2.639	2.477
6	***	3.559	3.223	3.928	3.128
7	***	3.851	3.542	3.693	3.382
8	***	3.024	2.861	3.009	3.102
9	***	3.494	3.139	3.955	3.568
10	***	3.205	2.857	3.582	3.192
11	***	3.204	2.921	3.437	2.798
12	***	3.323	2.839	3.346	2.726
