# Supplementary material for: Individualized responses to velocity-based versus percentage-based resistance training in combat sports athletes: the influence of baseline characteristics
Source: PeerJ. 2025 Sep 24;13:e19928. doi: 10.7717/peerj.19928 (PMC12476169; doi:10.7717/peerj.19928)
Supplement: Supplemental Information 4 [file peerj-13-19928-s004.xlsx]

## Sheet: experimental group
The experimental group carried the test (unit: W）
Number	Name	left		right
		Before the experiment	After the experiment	Before the experiment	After the experiment
1	***	379	422	377	436
2	***	354	399	341	390
3	***	213	329	314	376
4	***	288	387	306	360
5	***	306	347	252	319
6	***	341	442	345	464
7	***	281	346	282	401
8	***	330	439	297	348
9	***	409	466	411	472
10	***	307	342	294	321
11	***	335	414	359	412
12	***	305	343	305	340

## Sheet: control group
The control group underwent a shoulder load test (unit: W）
Number	Name	left		right
		Before the experiment	After the experiment	Before the experiment	After the experiment
1	***	340	342	429	439
2	***	290	320	280	312
3	***	364	366	237	306
4	***	243	316	240	371
5	***	349	415	252	398
6	***	269	298	277	294
7	***	224	291	281	311
8	***	299	394	316	373
9	***	255	357	272	341
10	***	396	442	346	440
11	***	316	419	345	445
12	***	372	382	422	456
