# Supplementary material for: Individualized responses to velocity-based versus percentage-based resistance training in combat sports athletes: the influence of baseline characteristics
Source: PeerJ. 2025 Sep 24;13:e19928. doi: 10.7717/peerj.19928 (PMC12476169; doi:10.7717/peerj.19928)
Supplement: Supplemental Information 5 [file peerj-13-19928-s005.xlsx]

## Sheet: experimental group
The experimental group carried the test (unit: W）
Number	Name	left		right
		Before the experiment	After the experiment	Before the experiment	After the experiment
1	***	379	432	377	436
2	***	354	399	341	392
3	***	213	309	314	396
4	***	288	377	306	387
5	***	306	367	252	319
6	***	341	442	345	464
7	***	281	346	282	401
8	***	330	439	297	348
9	***	409	466	411	472
10	***	307	362	294	331
11	***	335	414	359	422
12	***	305	343	305	340

## Sheet: control group
The control group underwent a shoulder load test (unit: W）
Number	Name	left		right
		Before the experiment	After the experiment	Before the experiment	After the experiment
1	***	340	342	429	439
2	***	290	310	280	312
3	***	364	386	237	256
4	***	243	268	240	273
5	***	349	398	252	307
6	***	269	288	277	302
7	***	224	261	281	321
8	***	299	354	316	373
9	***	255	307	272	331
10	***	396	442	346	410
11	***	316	379	345	435
12	***	372	382	422	446
