# Supplementary material for: Individualized responses to velocity-based versus percentage-based resistance training in combat sports athletes: the influence of baseline characteristics
Source: PeerJ. 2025 Sep 24;13:e19928. doi: 10.7717/peerj.19928 (PMC12476169; doi:10.7717/peerj.19928)
Supplement: Supplemental Information 6 [file peerj-13-19928-s006.xlsx]

## Sheet: experimental group
Experimental group vertical jump test
Number	Name	SJ		CMJ		swing arm-CMJ
		Before the experiment	After the experiment	Before the experiment	After the experiment	Before the experiment	After the experiment
1	***	34.575	39.841	37.636	40.825	41.536	47.594
2	***	38.044	42.397	40.543	43.851	47.594	51.173
3	***	32.523	38.455	38.868	43.412	44.736	50.699
4	***	39.7	42.541	42.6	47.885	54.5	62.332
5	***	43.158	47.364	43.03	49.007	48.851	54.588
6	***	39.6	43.412	40.8	44.736	43.9	50.699
7	***	33.67	42.686	39.423	46.979	48.515	56.384
8	***	41.679	47.137	43.705	48.979	55	56.869
9	***	34.396	36.556	40.261	43.412	42.109	48.361
10	***	43.558	47.594	44.145	48.207	51.65	58.555
11	***	36.955	39.137	39.998	44.965	50.976	57.809
12	***	36.023	39.841	38.181	46.543	50.699	57.173

## Sheet: control group
Control group vertical jump test
Number	Name	SJ		CMJ		swing arm-CMJ
		Before the experiment	After the experiment	Before the experiment	After the experiment	Before the experiment	After the experiment
1	***	39.701	43.267	42.541	43.998	47.594	50.699
2	***	40.542	41.809	43.74	46.369	54.1	56.065
3	***	42.253	43.705	42.686	45.479	50.227	53.902
4	***	44.884	47.289	48.824	52.128	51.491	55.871
5	***	46.079	47.289	47.137	50.384	53.577	56.037
6	***	33.402	35.33	36.985	40.9	42.375	47.163
7	***	38.868	39.562	40.402	43.558	46.38	49.29
8	***	42.541	45.778	48.67	49.445	56.203	58.382
9	***	37.5	45.479	42.686	48.979	44.44	53.4
10	***	39.145	44.884	45.181	47.594	49.757	55.211
11	***	33.851	35.032	37.442	37.9	45.288	50.4
12	***	39.701	42.109	42.253	45.479	47.594	52.449
